# Supplementary material for: Same-Day Counseling: Study Protocol for the Evaluation of a New Mental Health Service
Source: PubMed Central journal article supplement (PMC4757779; doi:10.2196/resprot.5206), 2016-02-03
Supplement: resprot_v5i1e22_app1.pdf [file resprot_v5i1e22_app1.pdf]

## Multimedia Appendix 1

### General Questions

When you first arrived, you listed the main problem that brought you to single-session counselling. Please complete the following questions about that main problem by choosing a number from 1 (none) to 10 (extreme).

|                                                                                                            | None |   |   | A little |   |   |   | A lot |   |    |
|------------------------------------------------------------------------------------------------------------|------|---|---|----------|---|---|---|-------|---|----|
| 1. How much stress is the problem causing you?                                                             | 1    | 2 | 3 | 4        | 5 | 6 | 7 | 8     | 9 | 10 |
| 2. How much of an understanding do you have about what is causing the problem?                             | 1    | 2 | 3 | 4        | 5 | 6 | 7 | 8     | 9 | 10 |
| 3. How much confidence do you have to fix, reduce, or cope with the problem?                               | 1    | 2 | 3 | 4        | 5 | 6 | 7 | 8     | 9 | 10 |
| 4. How much do you know about finding supports or resources to help fix, reduce, or cope with the problem? | 1    | 2 | 3 | 4        | 5 | 6 | 7 | 8     | 9 | 10 |
